# Supplementary material for: Ecological Impacts of Megaprojects: Species Succession and Functional Composition
Source: MDPI journal article supplement (doi:10.3390/plants10112411), 2021-11-08
Supplement: s1 [file s1]

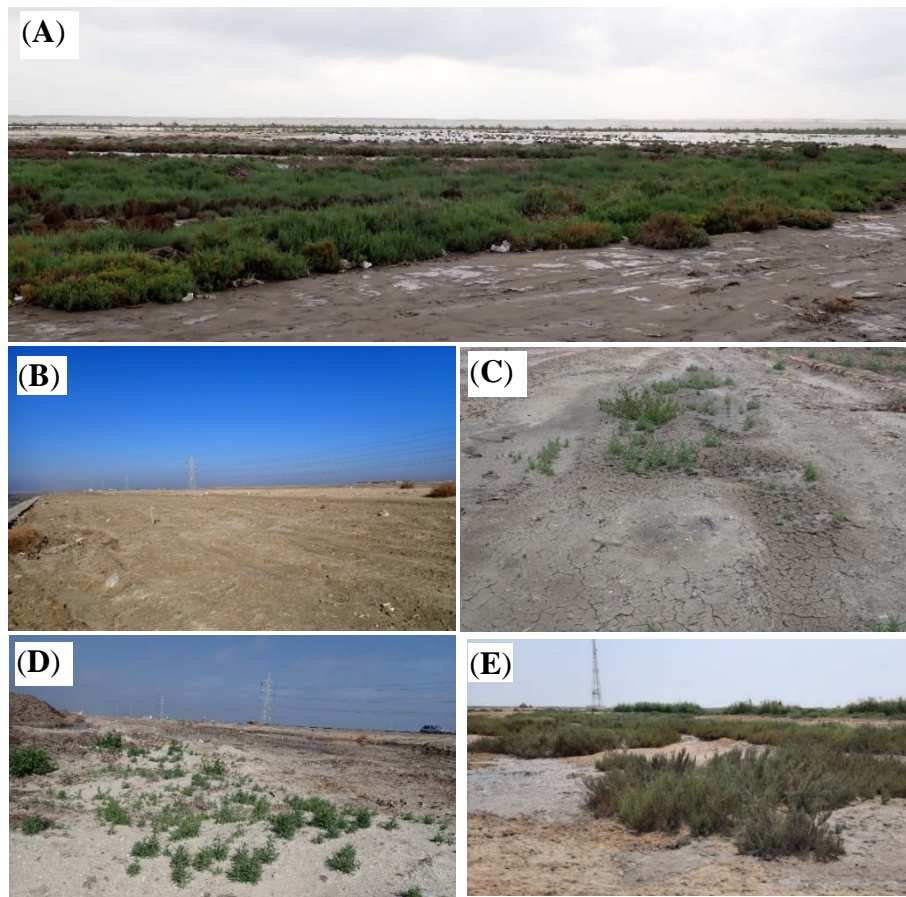

**Figure S1.** Differences in vegetation cover before and after the pipeline construction where (A) shows the vegetation cover before the pipeline construction (April 2017); (B) April 2019; (C) August 2019; (D) April 2020; and (E) August 2020.

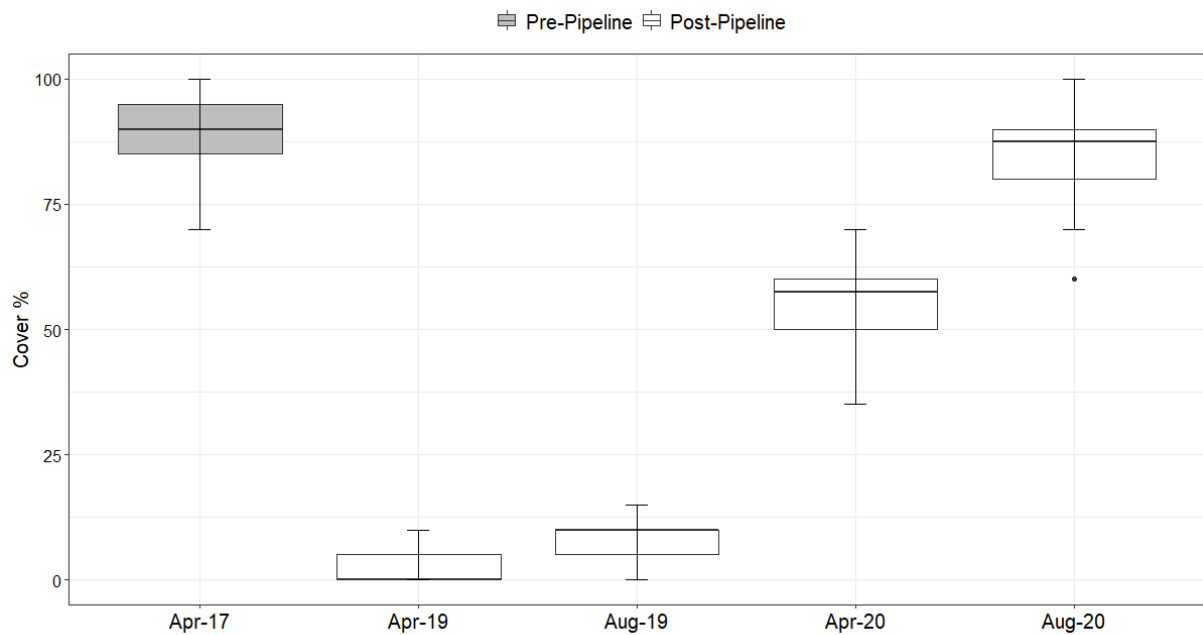

**Figure S2.** Differences in cover percentage between the five sampling events (pre-pipeline construction in grey and post-pipeline construction in white). Letters above the boxes indicate significant differences based on Tukey's HSD at the  $p < 0.05$  threshold.

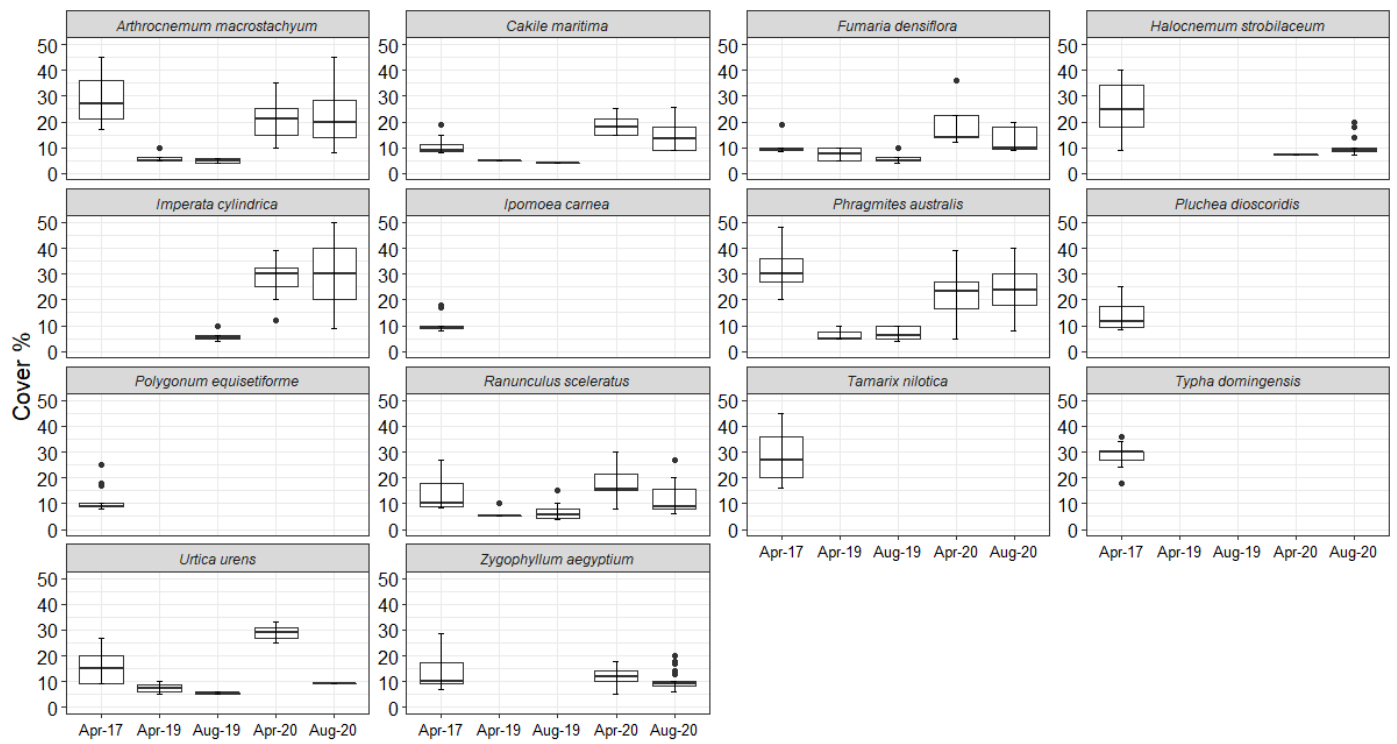

**Figure S3.** Differences in total species cover percentages per plot for the five sampling events (before and after the megaproject).

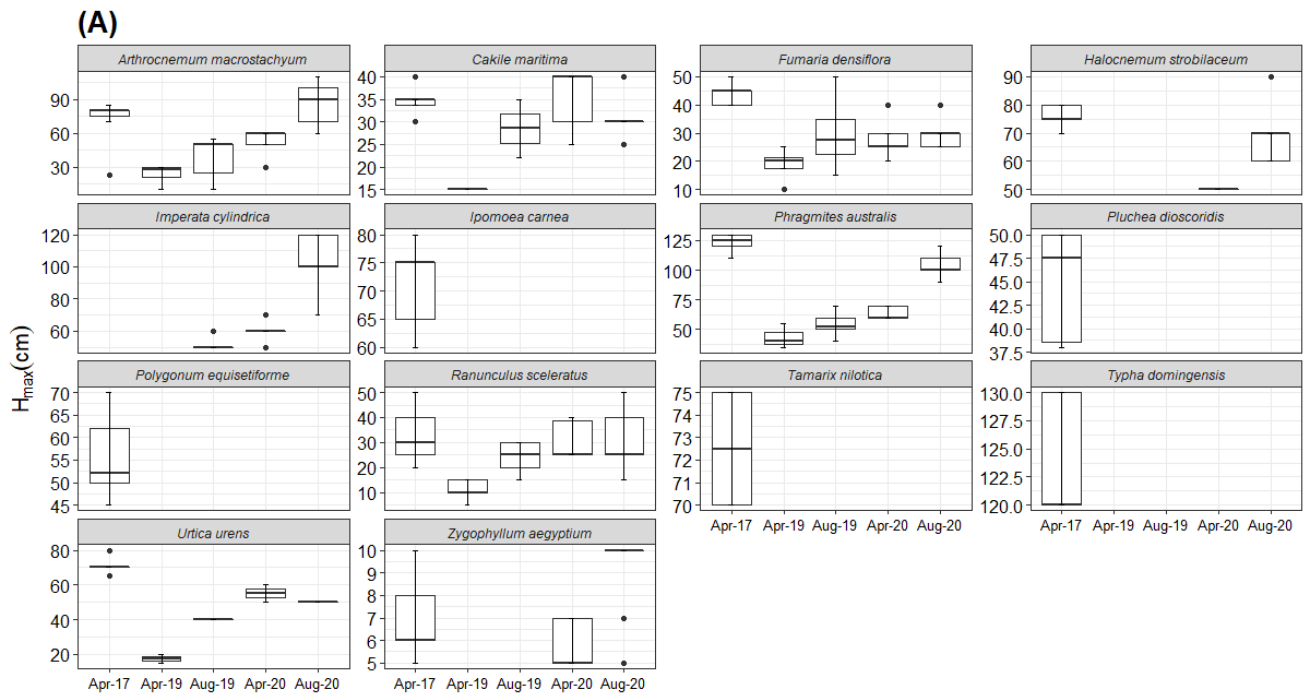

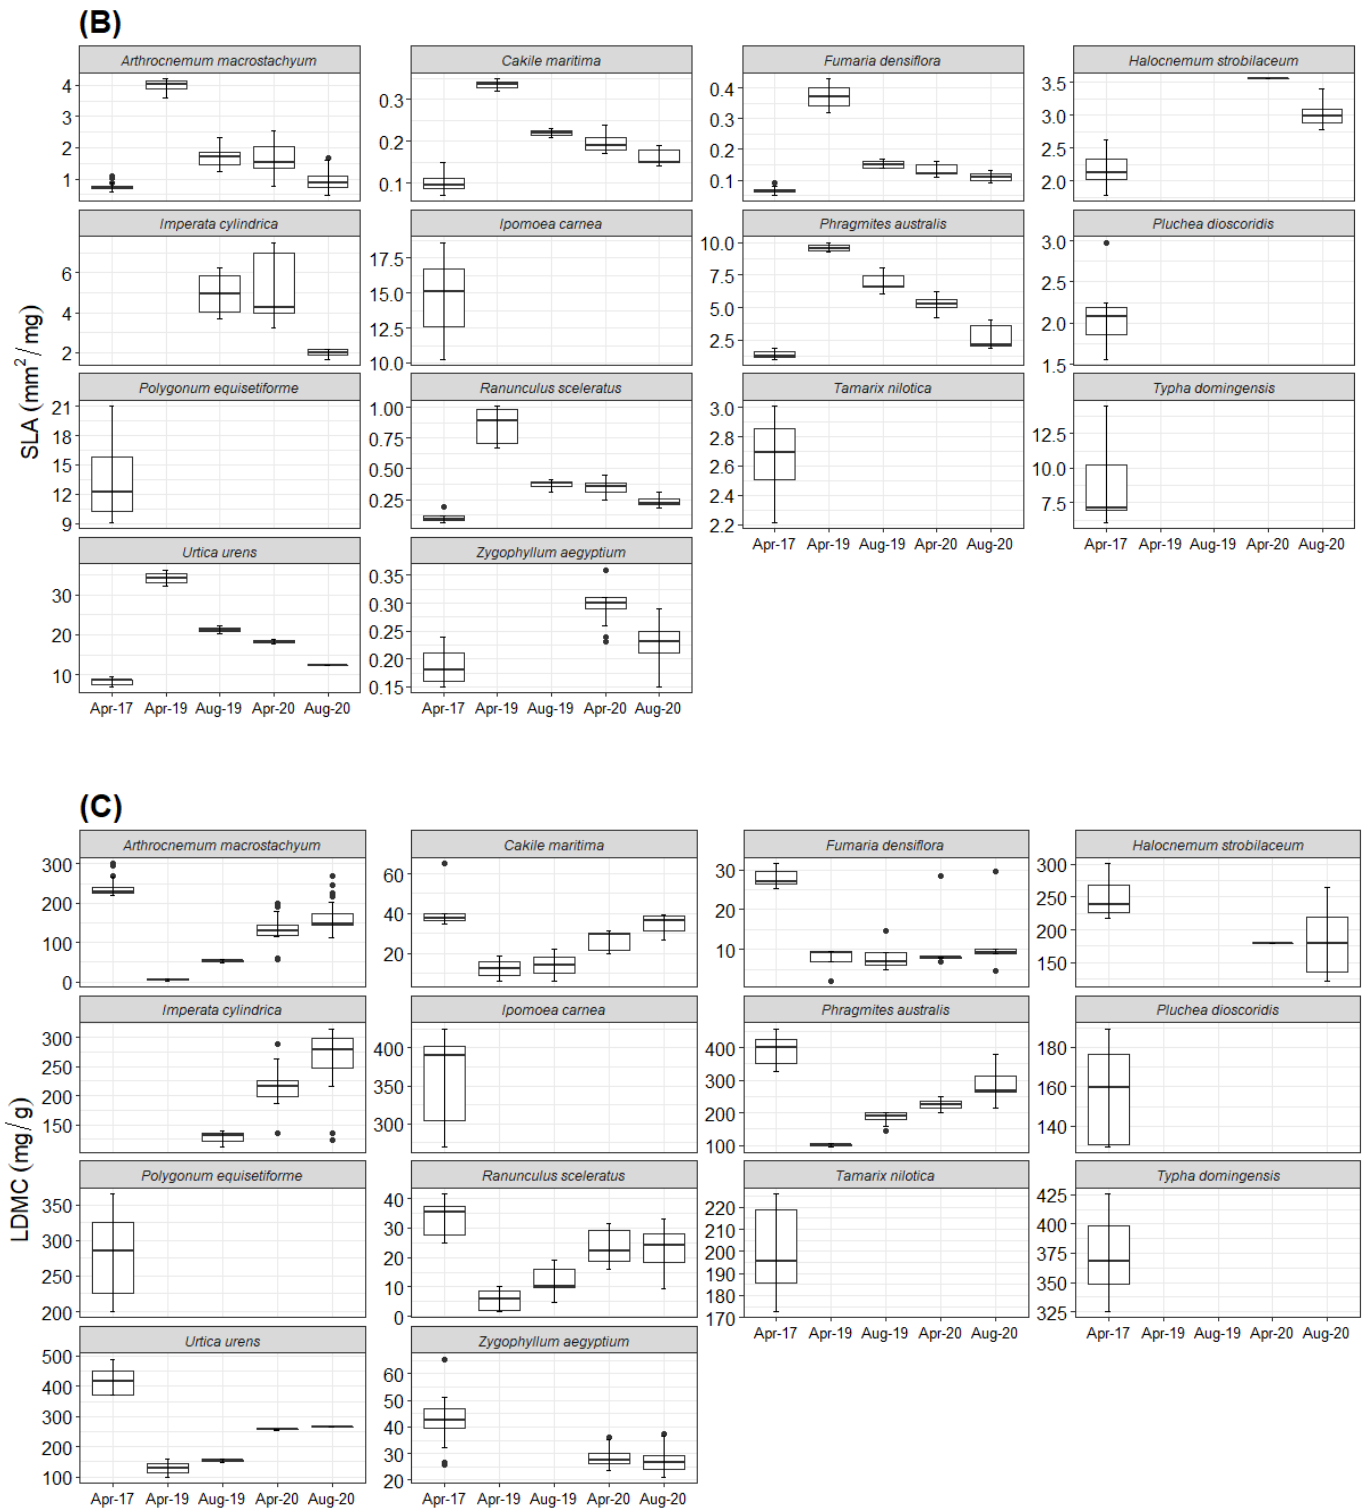

**Figure S4.** Differences of plant functional traits between species for the five sampling events (before and after the project) in (A) maximum plant height ( $H_{\max}$ ), (B) specific leaf area (SLA), and (C) leaf dry matter content (LDMC).

**Table S1.** ANOVA output for differences in maximum plant height ( $H_{\max}$ ), specific leaf area (SLA), and leaf dry matter content (LDMC) between the 14 recorded species for the five sampling events.

| Species                                               | $H_{\max}$ |     |          | SLA      |     |          | LDMC     |     |          |
|-------------------------------------------------------|------------|-----|----------|----------|-----|----------|----------|-----|----------|
|                                                       | <i>F</i>   | df  | <i>P</i> | <i>F</i> | df  | <i>P</i> | <i>F</i> | df  | <i>P</i> |
| <i>Arthrocnemum macrostachyum</i> (Moric.)<br>C, Koch | 40.5       | 118 | <0.001   | 121.3    | 118 | <0.001   | 119.3    | 118 | <0.001   |
| <i>Cakile maritima</i> Scop.                          | 6.165      | 17  | <0.01    | 42.71    | 17  | <0.001   | 7.97     | 17  | <0.001   |
| <i>Fumaria densiflora</i> DC.                         | 9.74       | 23  | <0.001   | 133.9    | 23  | <0.001   | 13.73    | 23  | <0.001   |
| <i>Halocnemum strobilaceum</i> (Pall.) Bieb.          | 17.56      | 35  | <0.001   | 86.91    | 35  | <0.001   | 15.4     | 35  | <0.001   |
| <i>Imperata cylindrica</i> (L.) P. Beauv.             | 203        | 81  | <0.001   | 114.5    | 81  | <0.001   | 57.25    | 81  | <0.001   |
| <i>Ipomoea carnea</i> Jacq.                           | -          | -   | -        | -        | -   | -        | -        | -   | -        |
| <i>Phragmites australis</i> (Cav.) Trin. ex<br>Steud. | 335.1      | 80  | <0.001   | 282.9    | 80  | <0.001   | 111      | 80  | <0.001   |
| <i>Pluchea dioscoridis</i> (L.) DC.                   | -          | -   | -        | -        | -   | -        | -        | -   | -        |
| <i>Polygonum equisetiforme</i> Sibth. & Sm.           | -          | -   | -        | -        | -   | -        | -        | -   | -        |
| <i>Ranunculus sceleratus</i> L.                       | 15.2       | 91  | <0.001   | 310.6    | 91  | <0.001   | 51.43    | 91  | <0.001   |
| <i>Tamarix nilotica</i> (Ehrenb.) Bunge               | -          | -   | -        | -        | -   | -        | -        | -   | -        |
| <i>Typha domingensis</i> Pers.                        | -          | -   | -        | -        | -   | -        | -        | -   | -        |
| <i>Urtica urens</i> L.                                | 66.02      | 12  | <0.001   | 186.1    | 12  | <0.001   | 31.96    | 12  | <0.001   |
| <i>Zygophyllum aegyptium</i> A. Hosny                 | 67.33      | 97  | <0.001   | 81.83    | 97  | <0.001   | 93.64    | 97  | <0.001   |

**Table S2.** The coefficient of variation (cv) of the maximum plant height ( $H_{\max}$ ), specific leaf area (SLA), and leaf dry matter content (LDMC) for each species at each of the five sampling events (before and after the project).

| Species                           | Date        | The Coefficient of Variation (cv) |       |       |
|-----------------------------------|-------------|-----------------------------------|-------|-------|
|                                   |             | $H_{\max}$                        | SLA   | LDMC  |
| <i>Arthrocnemum macrostachyum</i> | April 2017  | 24.86                             | 16.25 | 8.94  |
| <i>Arthrocnemum macrostachyum</i> | April 2019  | 39.85                             | 6.81  | 51.06 |
| <i>Arthrocnemum macrostachyum</i> | August 2019 | 41.99                             | 19.45 | 5.31  |
| <i>Arthrocnemum macrostachyum</i> | April 2020  | 12.10                             | 27.65 | 28.10 |
| <i>Arthrocnemum macrostachyum</i> | August 2020 | 21.18                             | 27.99 | 22.42 |
| <i>Cakile maritima</i>            | April 2017  | 9.32                              | 25.01 | 24.66 |
| <i>Cakile maritima</i>            | April 2019  | 0.00                              | 6.33  | 74.13 |
| <i>Cakile maritima</i>            | August 2019 | 32.25                             | 6.43  | 81.50 |
| <i>Cakile maritima</i>            | April 2020  | 20.20                             | 14.01 | 20.60 |
| <i>Cakile maritima</i>            | August 2020 | 17.67                             | 13.38 | 15.79 |
| <i>Fumaria densiflora</i>         | April 2017  | 7.76                              | 19.16 | 7.73  |
| <i>Fumaria densiflora</i>         | April 2019  | 33.55                             | 12.85 | 49.05 |
| <i>Fumaria densiflora</i>         | August 2019 | 49.07                             | 9.83  | 50.85 |
| <i>Fumaria densiflora</i>         | April 2020  | 27.08                             | 16.42 | 78.91 |
| <i>Fumaria densiflora</i>         | August 2020 | 20.41                             | 14.37 | 78.56 |
| <i>Halocnemum strobilaceum</i>    | April 2017  | 4.92                              | 10.53 | 11.14 |
| <i>Halocnemum strobilaceum</i>    | April 2019  | -                                 | -     | -     |
| <i>Halocnemum strobilaceum</i>    | August 2019 | -                                 | -     | -     |
| <i>Halocnemum strobilaceum</i>    | April 2020  | -                                 | -     | -     |
| <i>Halocnemum strobilaceum</i>    | August 2020 | 10.89                             | 5.85  | 26.10 |
| <i>Imperata cylindrica</i>        | April 2017  | -                                 | -     | -     |
| <i>Imperata cylindrica</i>        | April 2019  | -                                 | -     | -     |
| <i>Imperata cylindrica</i>        | August 2019 | 8.11                              | 19.99 | 7.12  |
| <i>Imperata cylindrica</i>        | April 2020  | 7.94                              | 30.21 | 15.60 |
| <i>Imperata cylindrica</i>        | August 2020 | 12.43                             | 8.05  | 16.51 |
| <i>Ipomoea carnea</i>             | April 2017  | 9.48                              | 17.07 | 13.97 |
| <i>Ipomoea carnea</i>             | April 2019  | -                                 | -     | -     |
| <i>Ipomoea carnea</i>             | August 2019 | -                                 | -     | -     |
| <i>Ipomoea carnea</i>             | April 2020  | -                                 | -     | -     |

|                                |             |       |       |       |
|--------------------------------|-------------|-------|-------|-------|
| <i>Ipomoea carnea</i>          | August 2020 | -     | -     | -     |
| <i>Phragmites australis</i>    | April 2017  | 6.32  | 19.79 | 11.14 |
| <i>Phragmites australis</i>    | April 2019  | 24.02 | 4.03  | 4.45  |
| <i>Phragmites australis</i>    | August 2019 | 14.11 | 9.55  | 9.34  |
| <i>Phragmites australis</i>    | April 2020  | 7.55  | 9.13  | 5.95  |
| <i>Phragmites australis</i>    | August 2020 | 6.56  | 29.40 | 14.94 |
| <i>Pluchea dioscoridis</i>     | April 2017  | 12.79 | 17.98 | 15.24 |
| <i>Pluchea dioscoridis</i>     | April 2019  | -     | -     | -     |
| <i>Pluchea dioscoridis</i>     | August 2019 | -     | -     | -     |
| <i>Pluchea dioscoridis</i>     | April 2020  | -     | -     | -     |
| <i>Pluchea dioscoridis</i>     | August 2020 | -     | -     | -     |
| <i>Polygonum equisetiforme</i> | April 2017  | 12.95 | 23.96 | 18.88 |
| <i>Polygonum equisetiforme</i> | April 2019  | -     | -     | -     |
| <i>Polygonum equisetiforme</i> | August 2019 | -     | -     | -     |
| <i>Polygonum equisetiforme</i> | April 2020  | -     | -     | -     |
| <i>Polygonum equisetiforme</i> | August 2020 | -     | -     | -     |
| <i>Ranunculus sceleratus</i>   | April 2017  | 25.76 | 37.64 | 16.14 |
| <i>Ranunculus sceleratus</i>   | April 2019  | 30.00 | 15.59 | 59.39 |
| <i>Ranunculus sceleratus</i>   | August 2019 | 22.46 | 8.85  | 40.19 |
| <i>Ranunculus sceleratus</i>   | April 2020  | 22.42 | 15.07 | 24.15 |
| <i>Ranunculus sceleratus</i>   | August 2020 | 31.86 | 16.52 | 28.55 |
| <i>Tamarix nilotica</i>        | April 2017  | 3.69  | 11.31 | 10.61 |
| <i>Tamarix nilotica</i>        | April 2019  | -     | -     | -     |
| <i>Tamarix nilotica</i>        | August 2019 | -     | -     | -     |
| <i>Tamarix nilotica</i>        | April 2020  | -     | -     | -     |
| <i>Tamarix nilotica</i>        | August 2020 | -     | -     | -     |
| <i>Typha domingensis</i>       | April 2017  | 3.70  | 27.66 | 8.72  |
| <i>Typha domingensis</i>       | April 2019  | -     | -     | -     |
| <i>Typha domingensis</i>       | August 2019 | -     | -     | -     |
| <i>Typha domingensis</i>       | April 2020  | -     | -     | -     |
| <i>Typha domingensis</i>       | August 2020 | -     | -     | -     |
| <i>Urtica urens</i>            | April 2017  | 6.63  | 11.98 | 11.31 |
| <i>Urtica urens</i>            | April 2019  | 20.20 | 8.58  | 32.56 |
| <i>Urtica urens</i>            | August 2019 | 0.00  | 7.16  | 4.44  |
| <i>Urtica urens</i>            | April 2020  | 12.86 | 4.83  | 1.32  |
| <i>Urtica urens</i>            | August 2020 | -     | -     | -     |
| <i>Zygophyllum aegyptium</i>   | April 2017  | 25.69 | 15.43 | 17.25 |
| <i>Zygophyllum aegyptium</i>   | April 2019  | -     | -     | -     |
| <i>Zygophyllum aegyptium</i>   | August 2019 | -     | -     | -     |
| <i>Zygophyllum aegyptium</i>   | April 2020  | 17.20 | 13.84 | 11.08 |
| <i>Zygophyllum aegyptium</i>   | August 2020 | 9.42  | 13.47 | 14.57 |
